# Supplementary material
Source: publisher figshare collection journal article supplement (https://gsajournals.figshare.com/ndownloader/files/13013789)
Supplement: Supplementary file 1 [file 13013789]

**Genomic analysis to identify signatures of artificial selection and** **loci associated with important economic traits in Duroc pigs**

Yunlong Ma1, Saixian Zhang1, Kaili Zhang, Chengchi Fang, Shengsong Xie, Xiaoyong Du, Xinyun Li, Debin Ni & Shuhong Zhao

Key Laboratory of Agricultural Animal Genetics, Breeding, and Reproduction of the Ministry of Education & Key Laboratory of Swine Genetics and Breeding of the Ministry of Agriculture, Huazhong Agricultural University, Wuhan 430070, P. R. China

**Correspondence and requests for materials should be addressed to:** Shuhong Zhao or Debin Ni (shzhao@mail.hzau.edu.cn, nidebin@mail.hzau.edu.cn)

1These authors contributed equally to this work.

Figure S1 The principal component analysis of 3 pig populations using the SNPs data after joint genotyping.


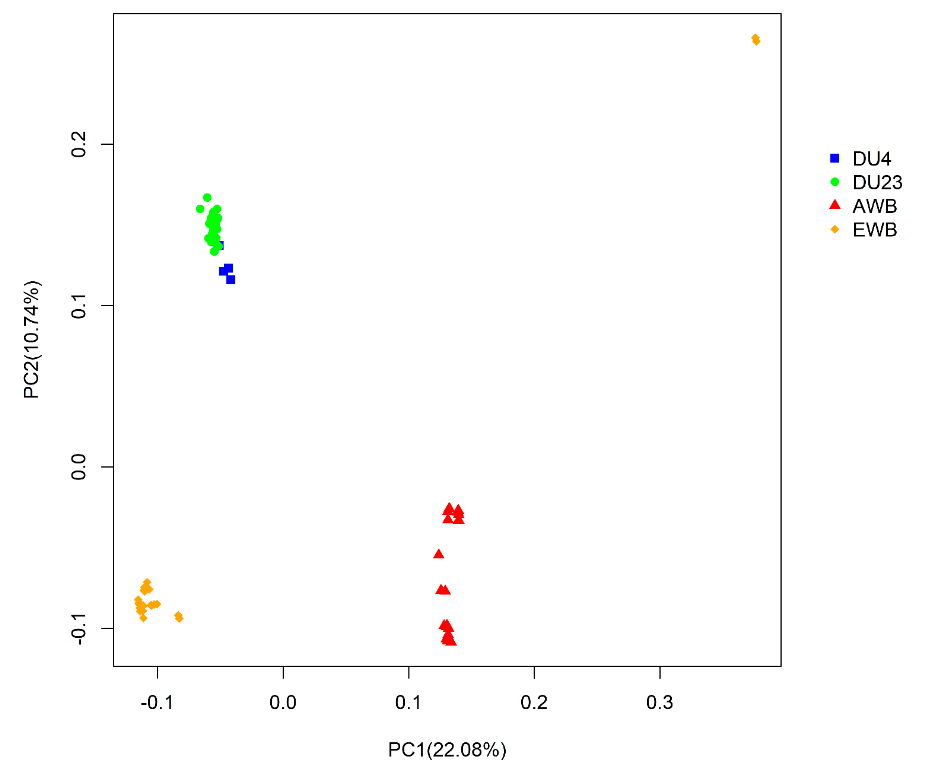


Figure S2 Linkage disequilibrium (LD) patterns of 3 pig populations.


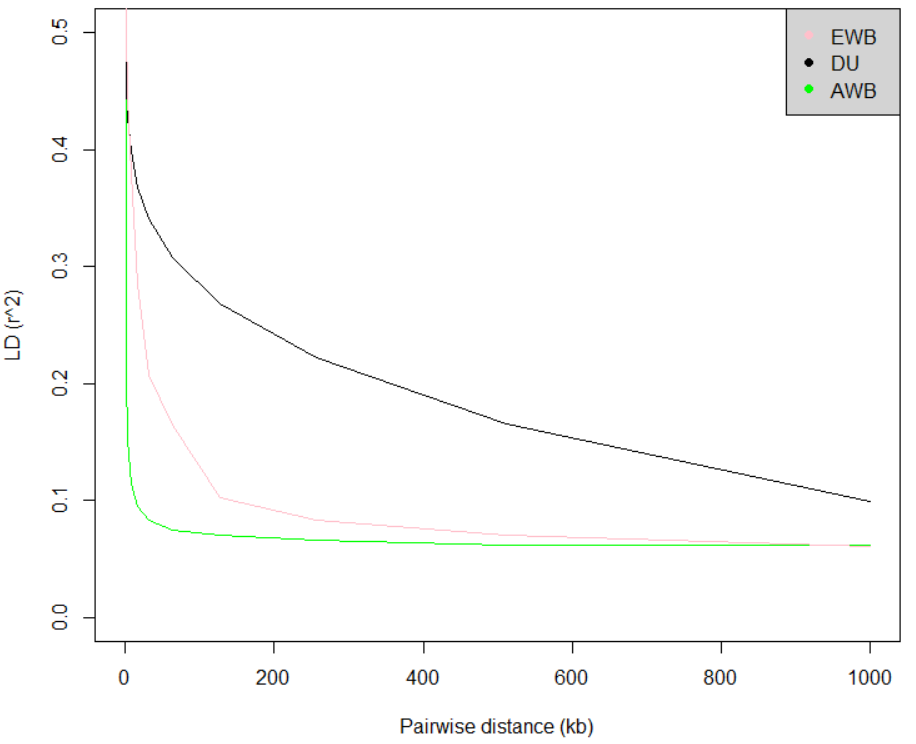


Figure S3 Venn diagrams showing the distribution of shared and unique SNPs.


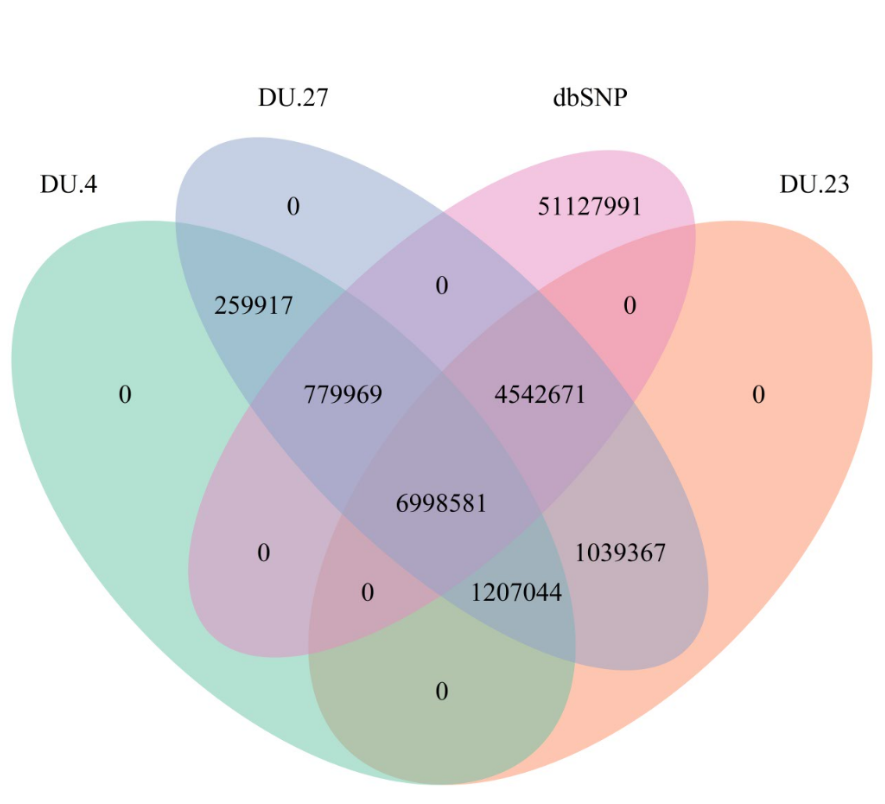


Figure S4 Genome-wide distribution of SNPs on basis of 282 individuals genotyped by sequencing. The number of SNPs was calculated for non-overlapping 250 kb windows across the pig genome. The diversities were illustrated by colors, with red indicating higher numbers and white indicating lower numbers.


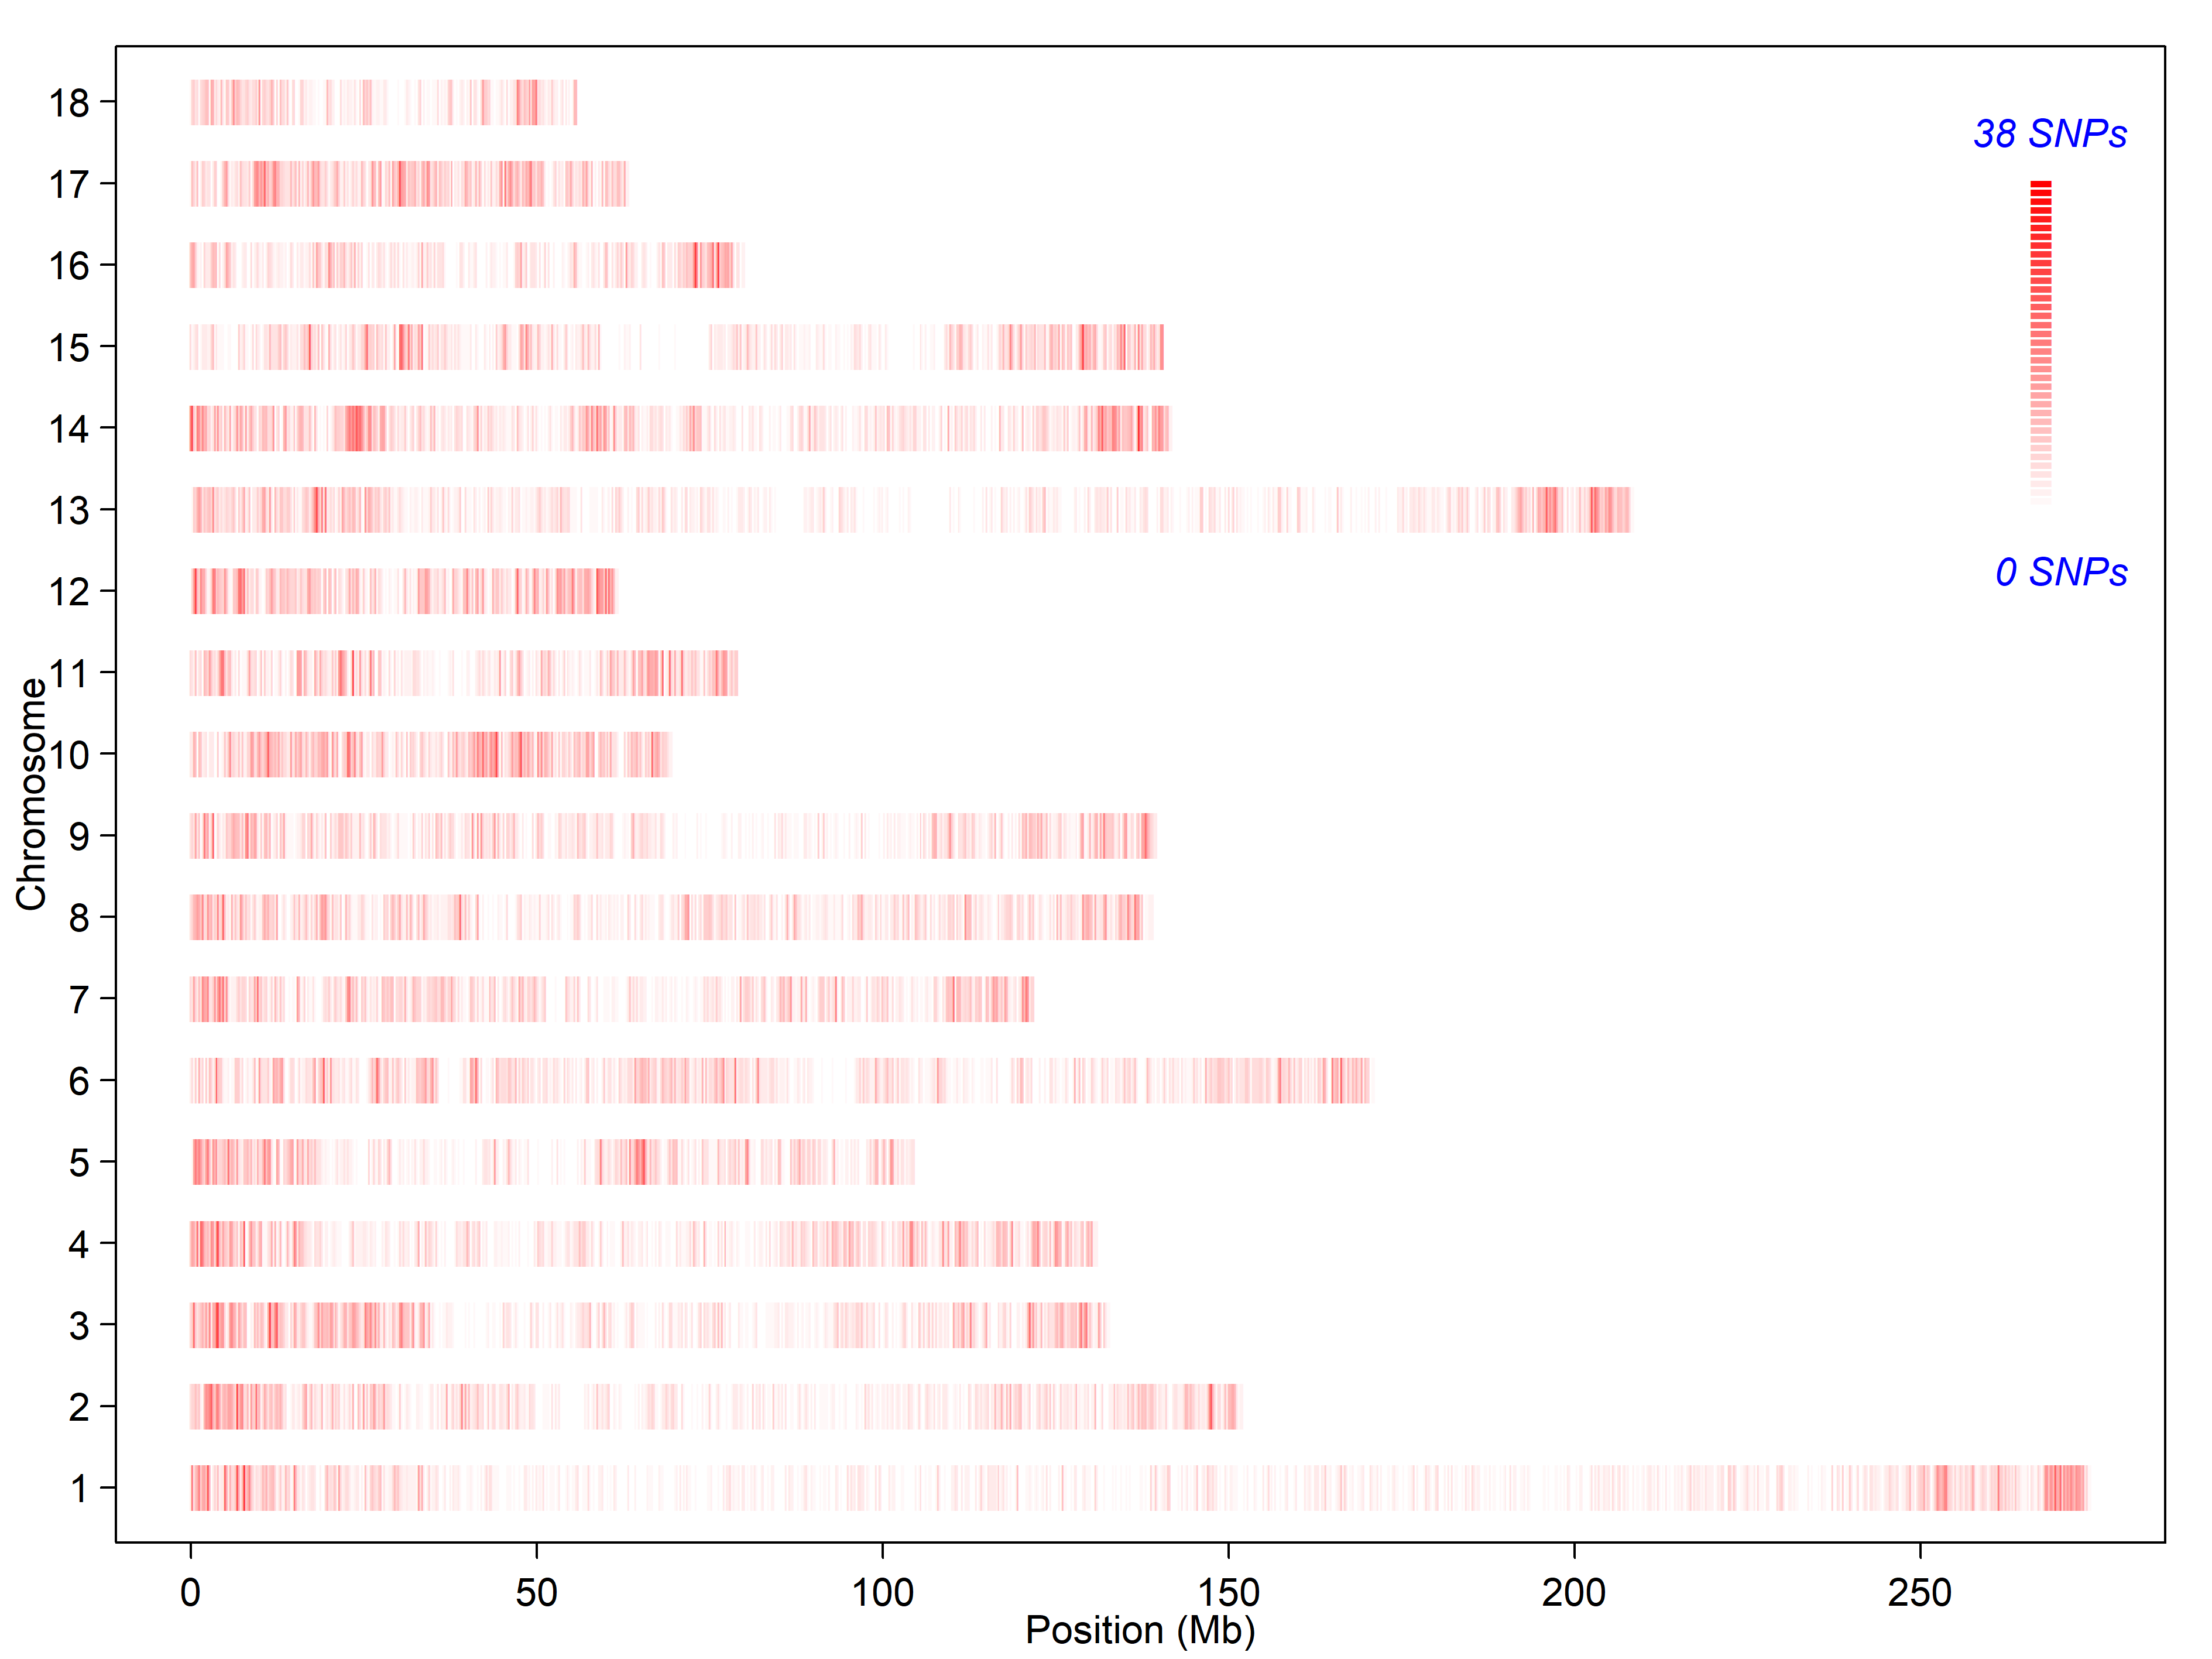


Figure S5 Genome-wide visualization of selection signatures identified by the composite likelihood ratio (CLR) tests for 3 pig populations.


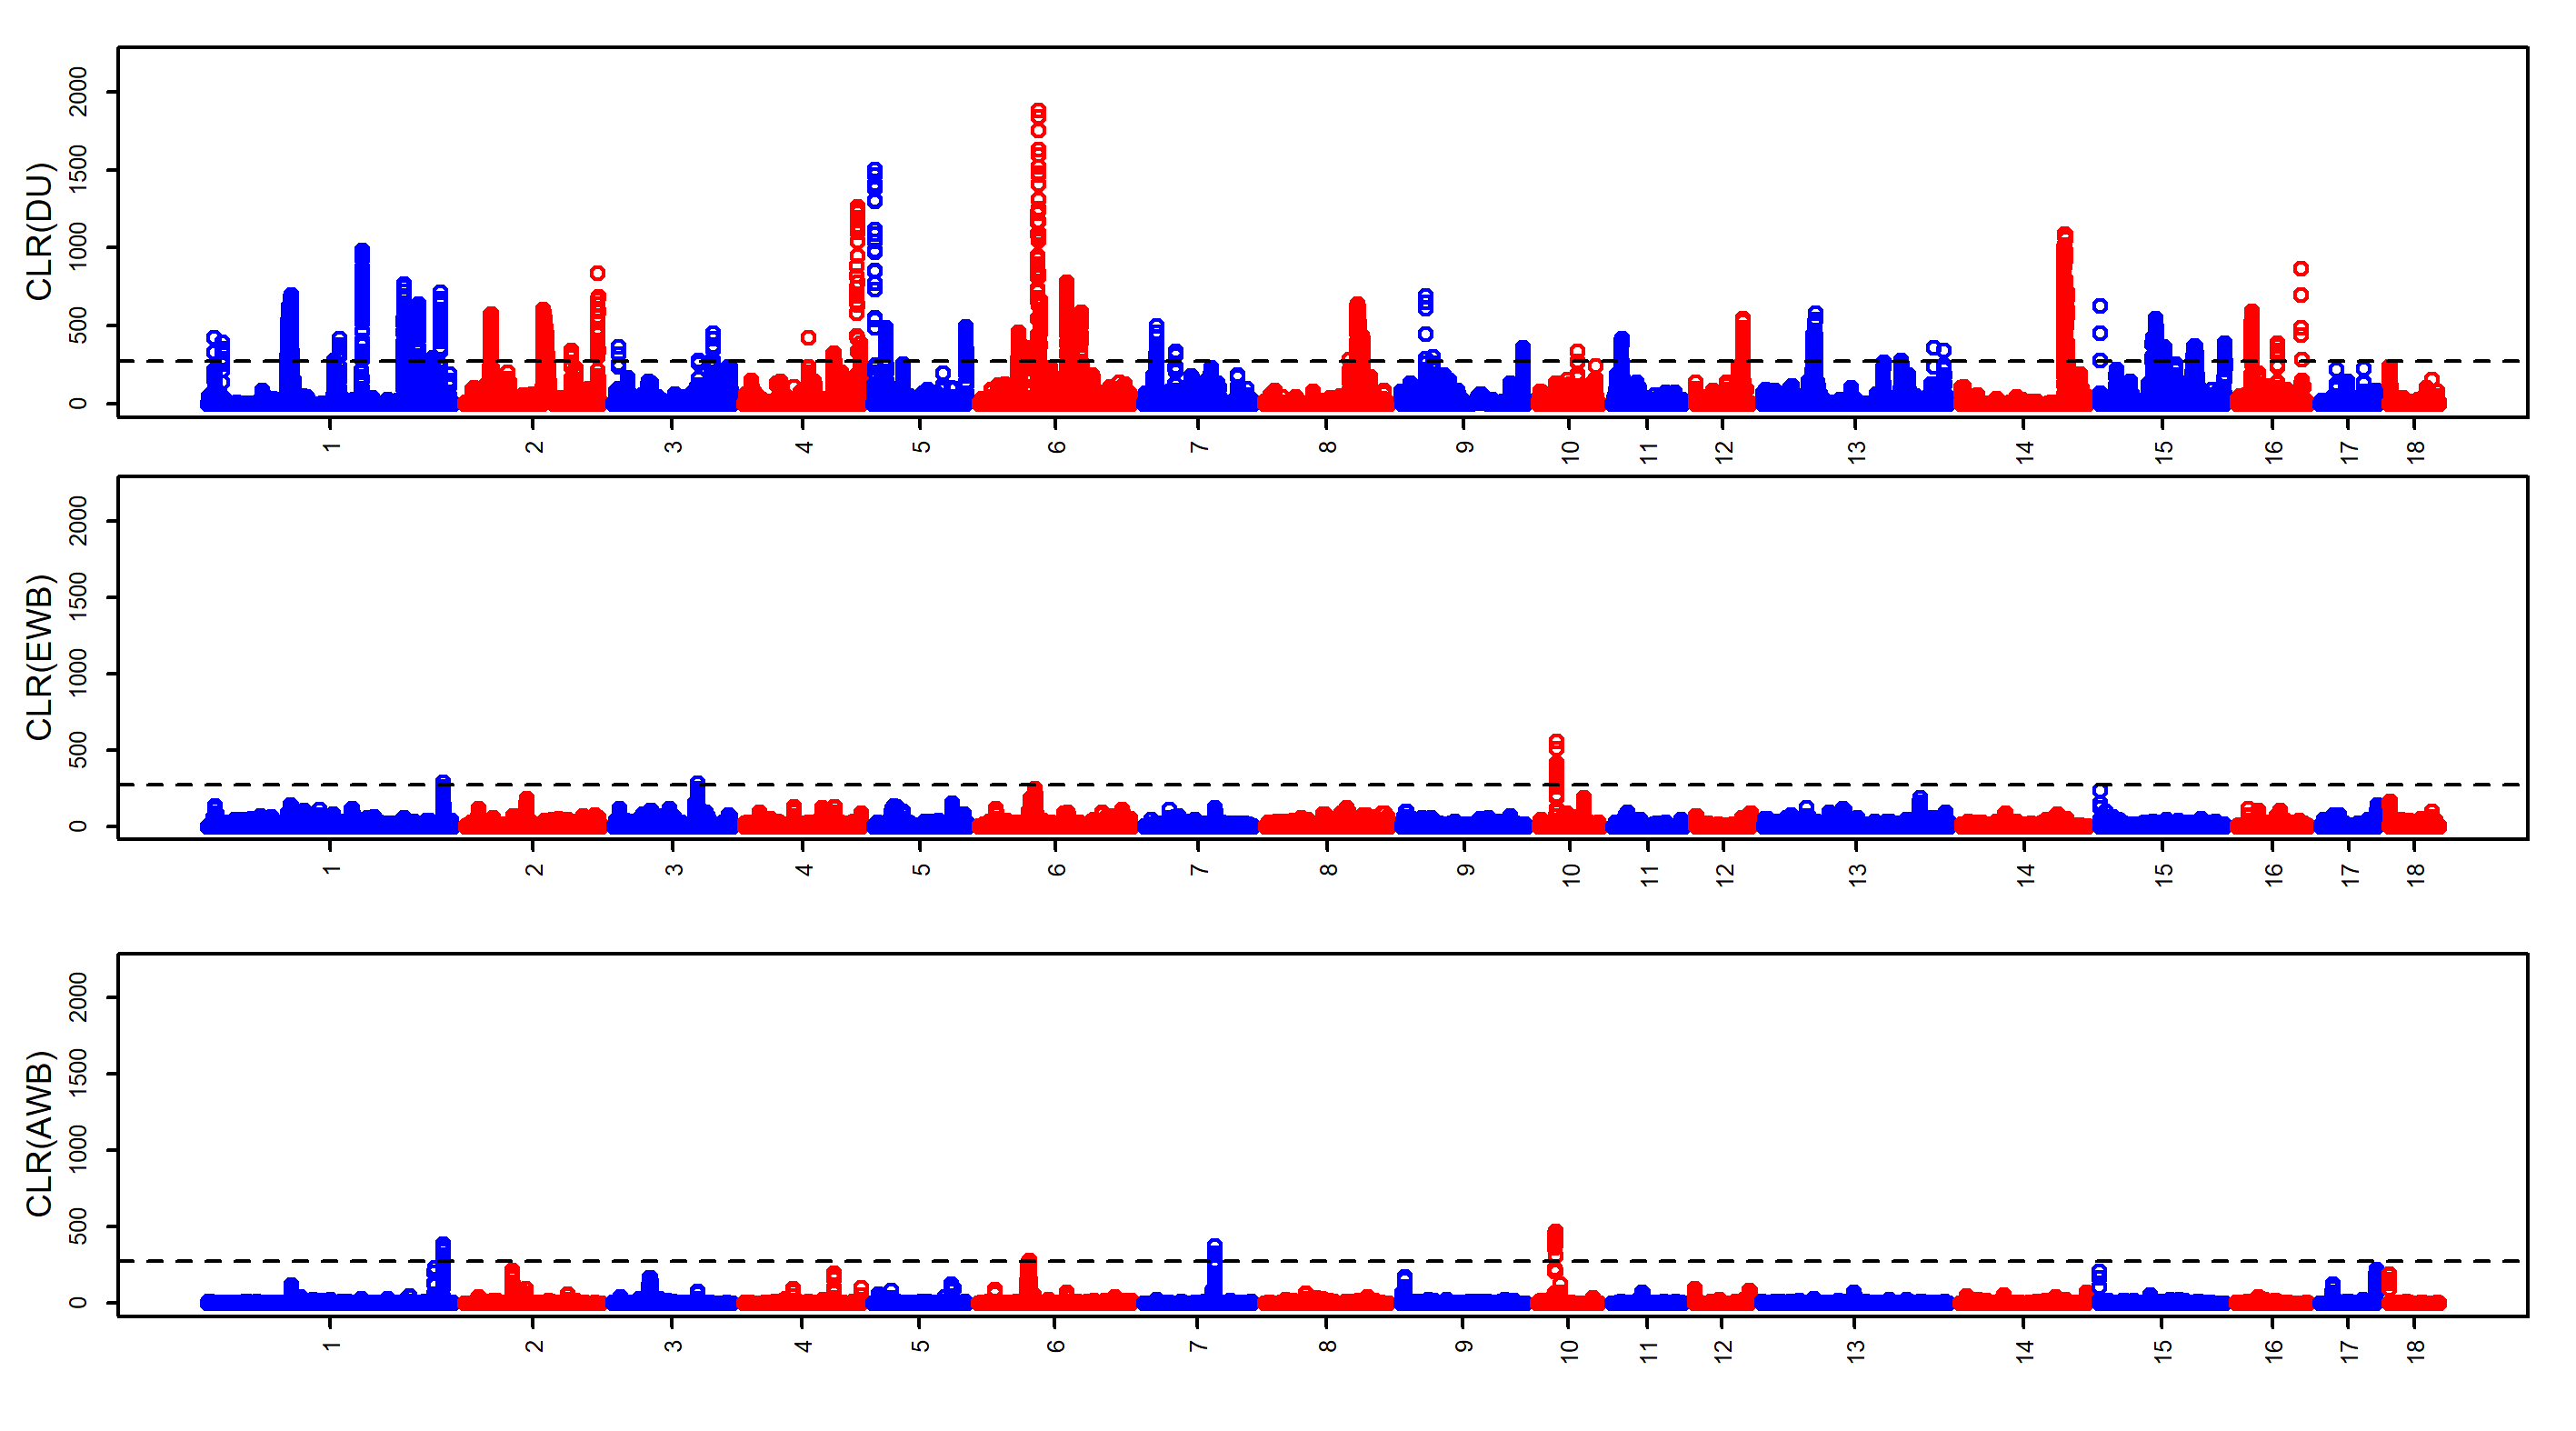


Figure S6 10 replicated visualizations of GWAS for intramuscular fat (IMF) trait using a random sampling of 250 individuals. The left Manhattan plots present the association of the imputed SNPs with the IMF trait in 250 Duroc individuals, respectively. The right is the corresponding quantile-quantile plots.


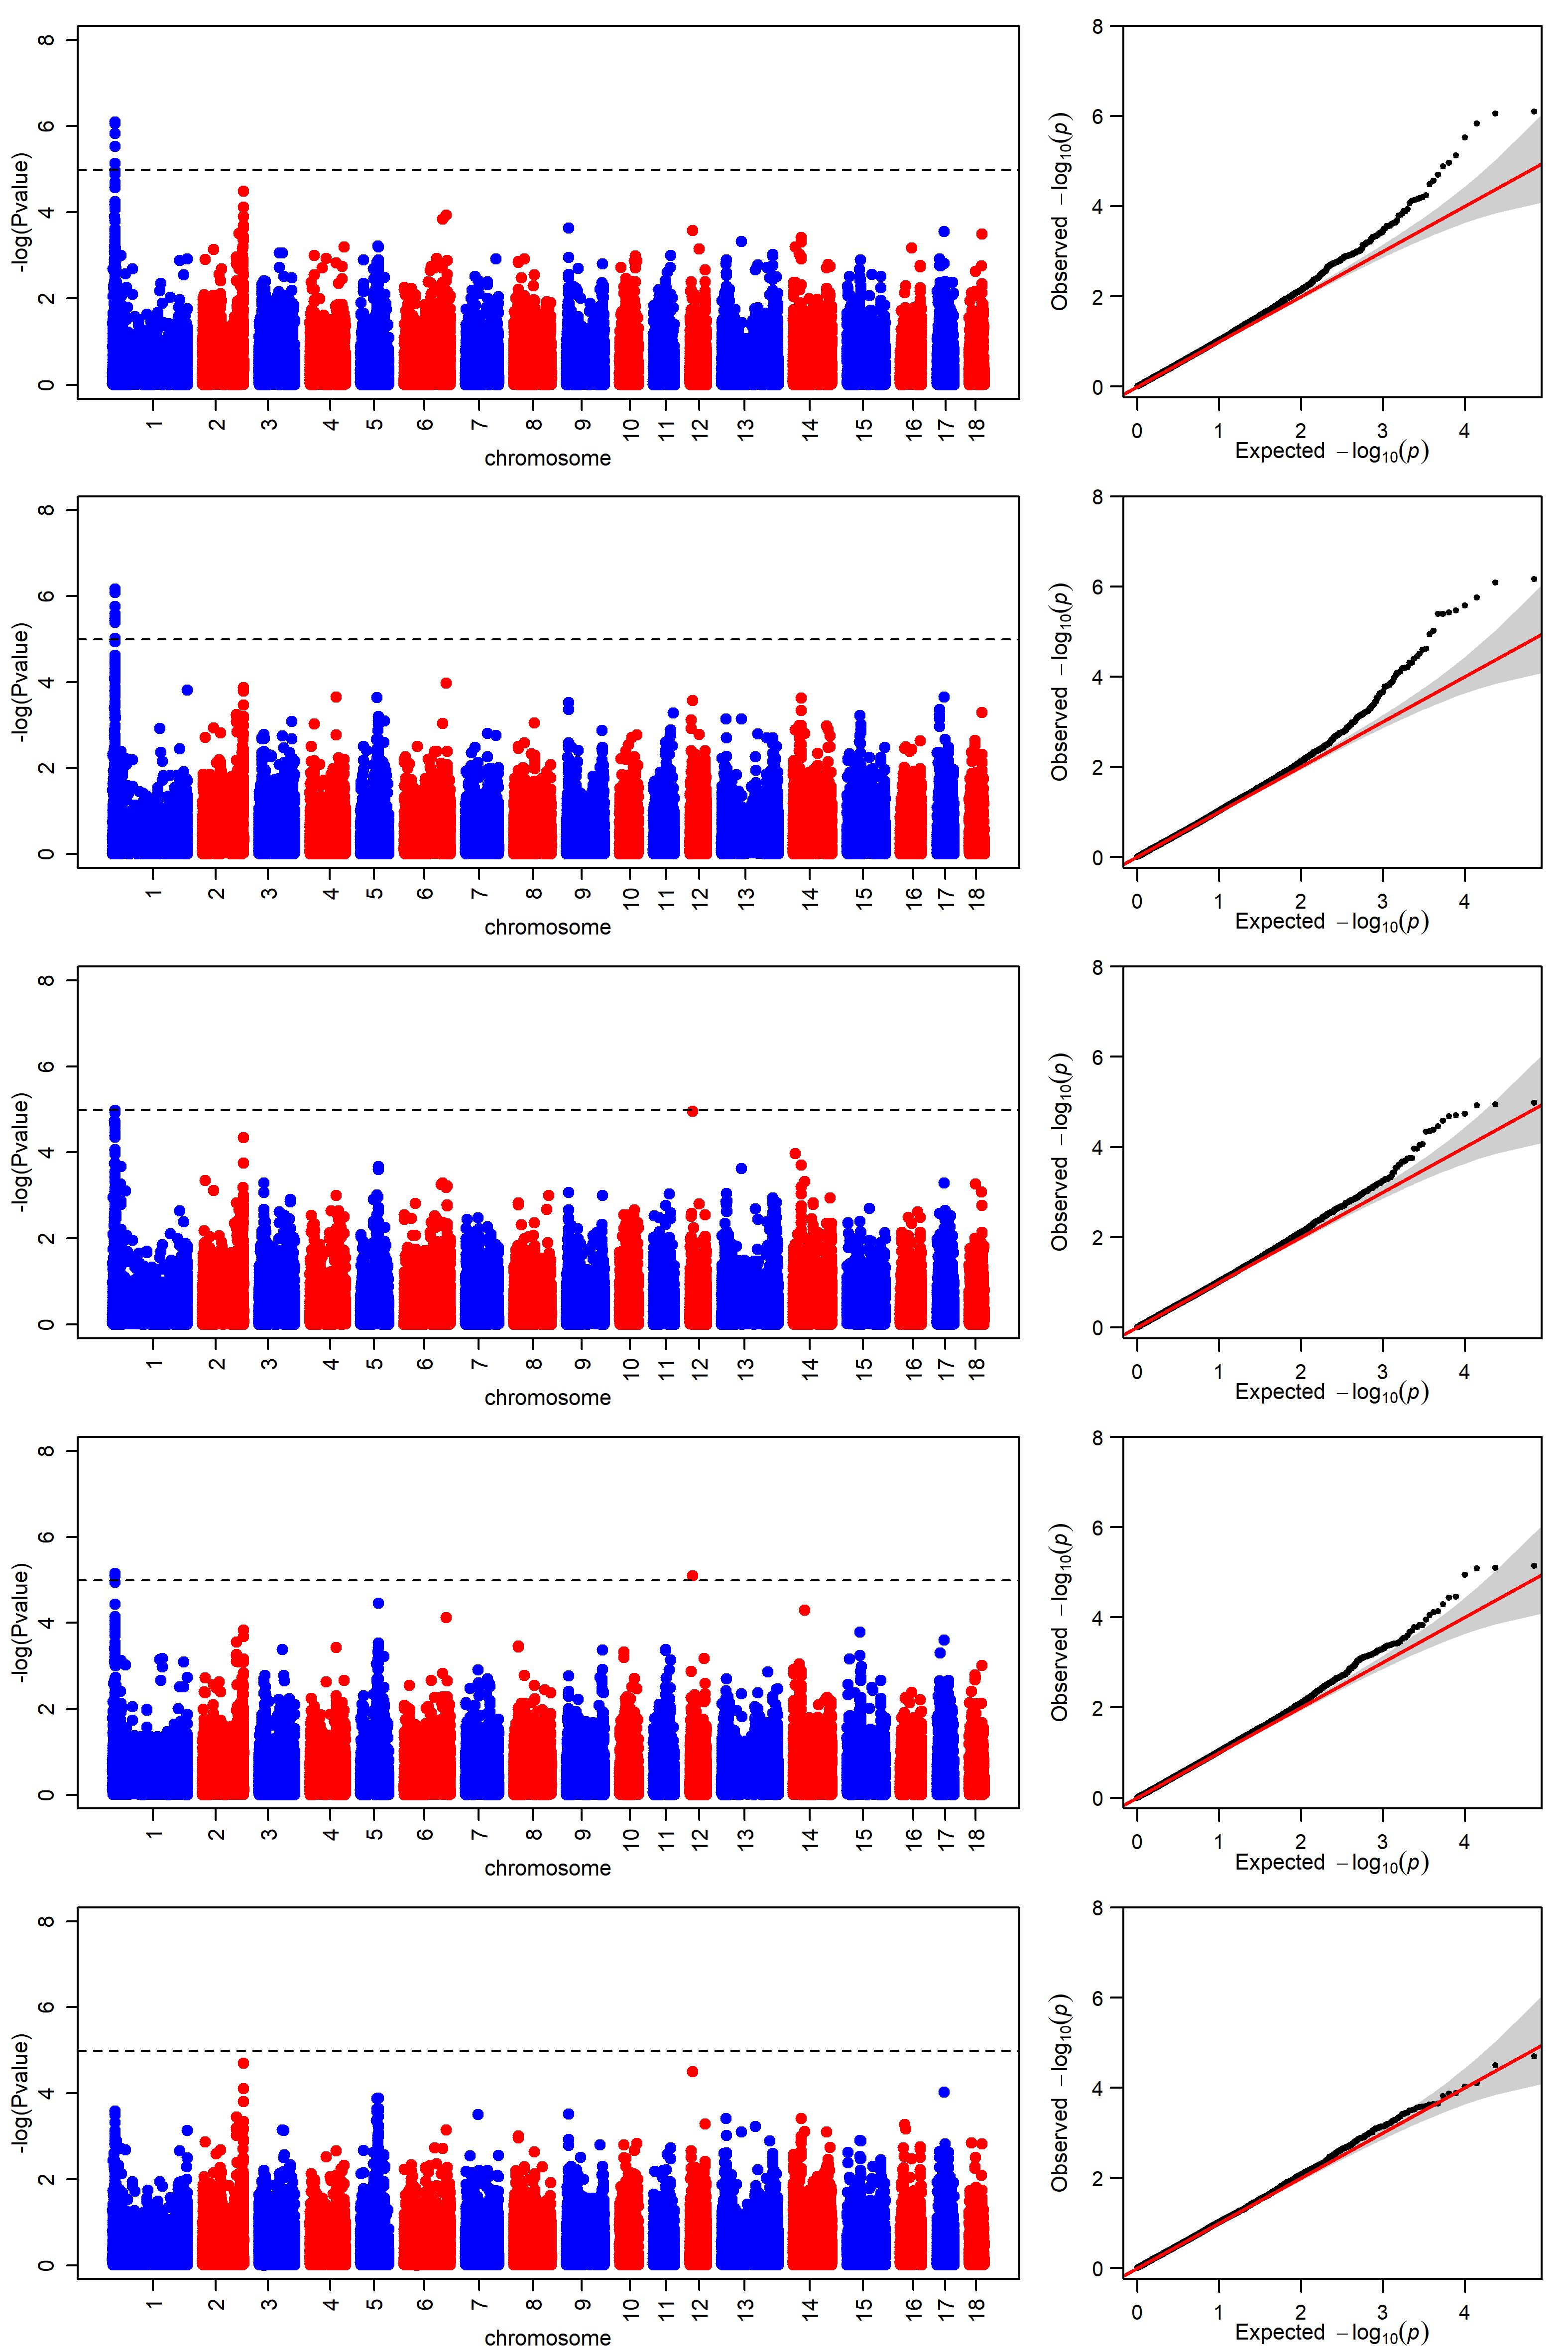


Figure S6 cont.


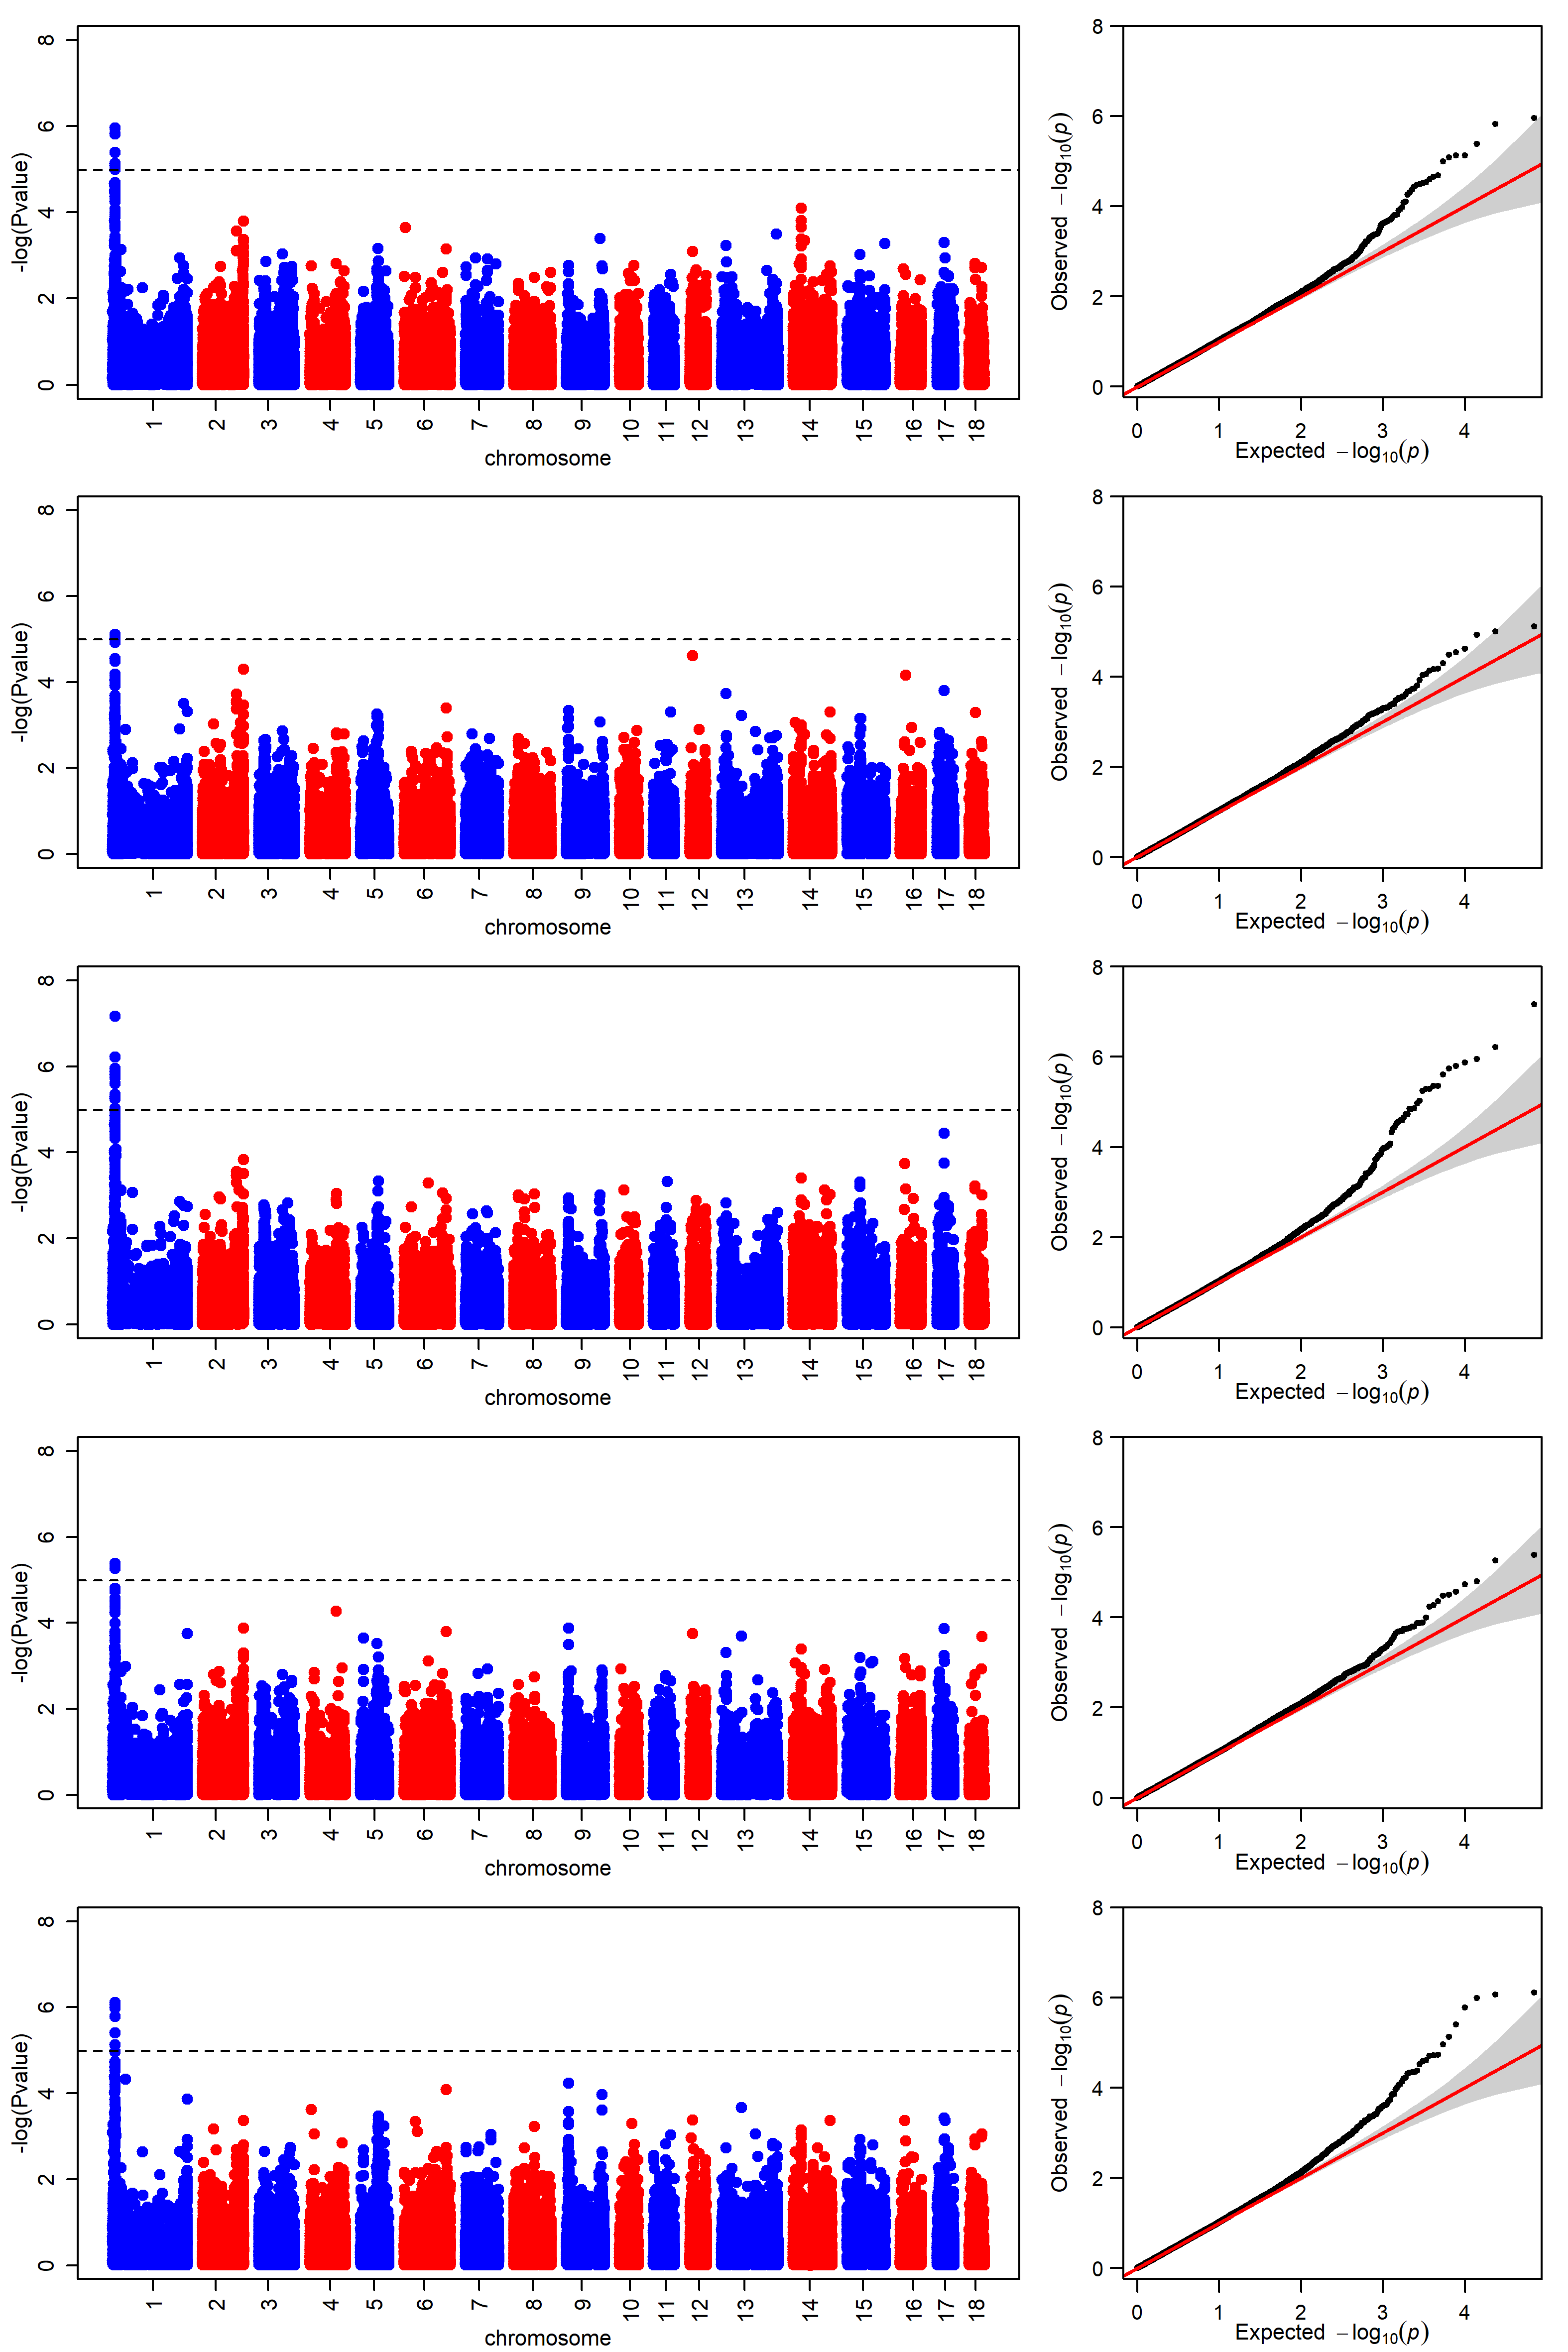


Figure S7 10 replicated visualizations of GWAS for feed conversion ratio (FCR) trait using a random sampling of 250 individuals. The left Manhattan plots present the association of the imputed SNPs with the FCR trait in 250 Duroc individuals, respectively. The right is the corresponding quantile-quantile plots.


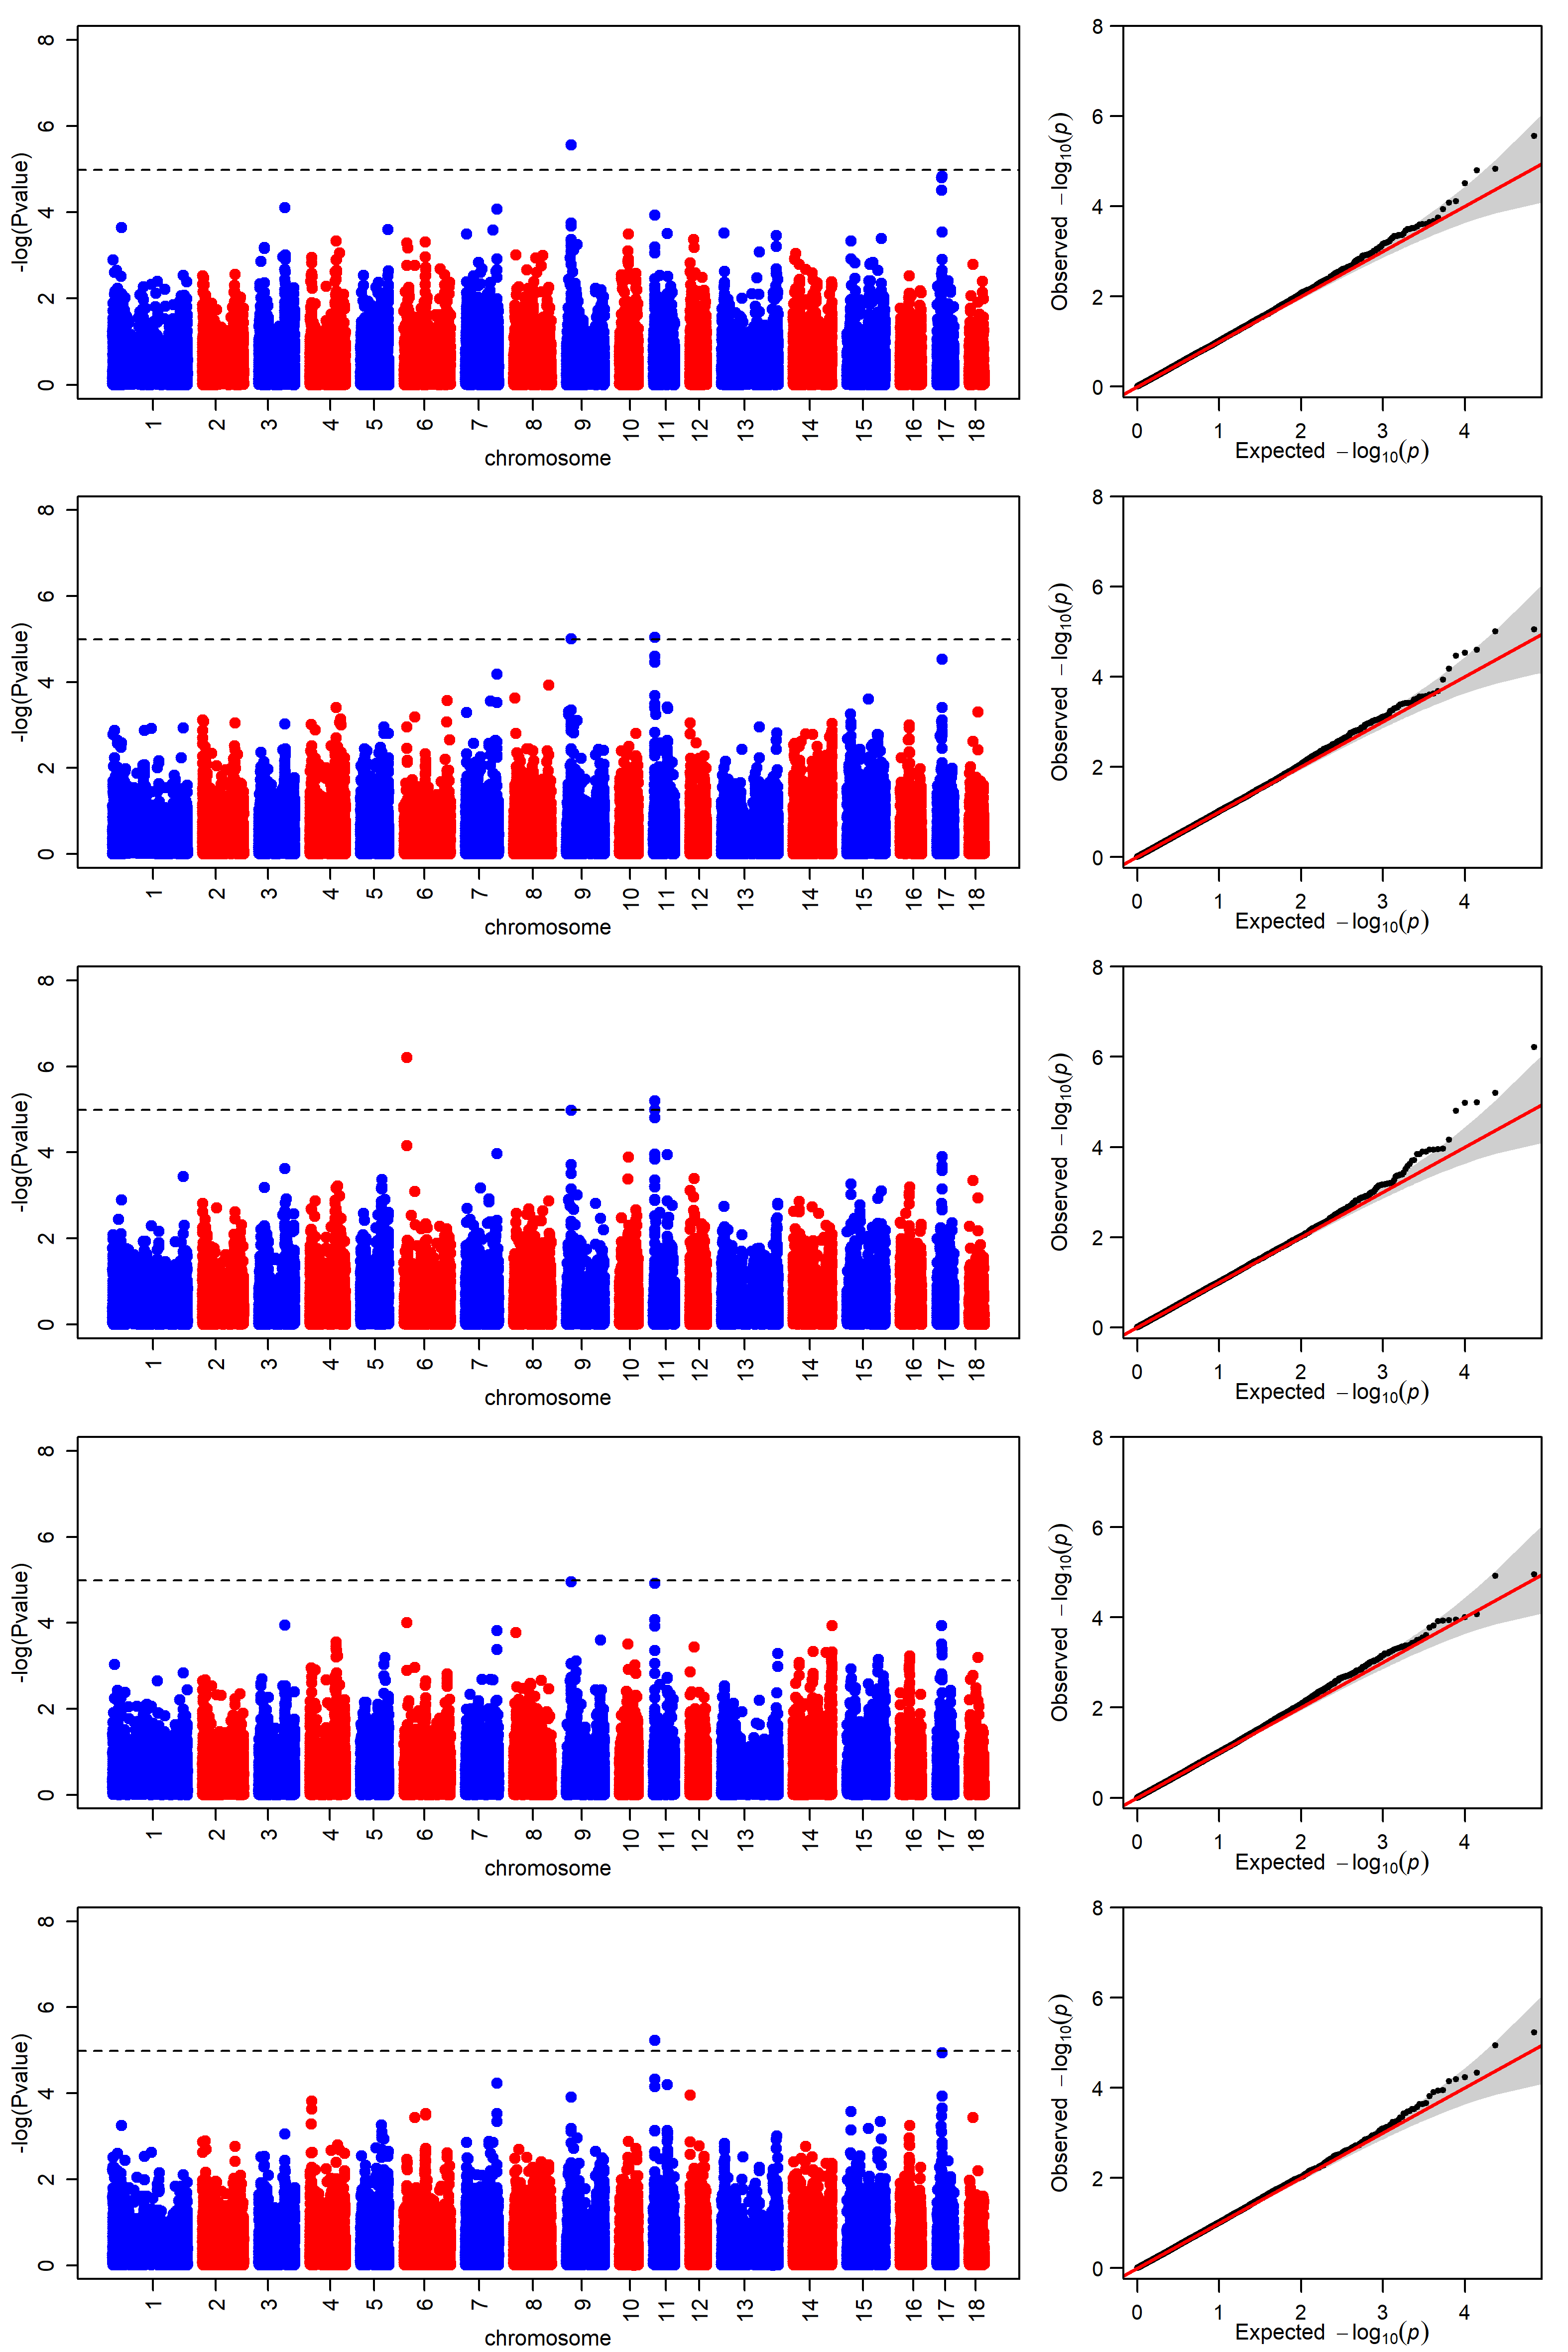


Figure S7 cont.


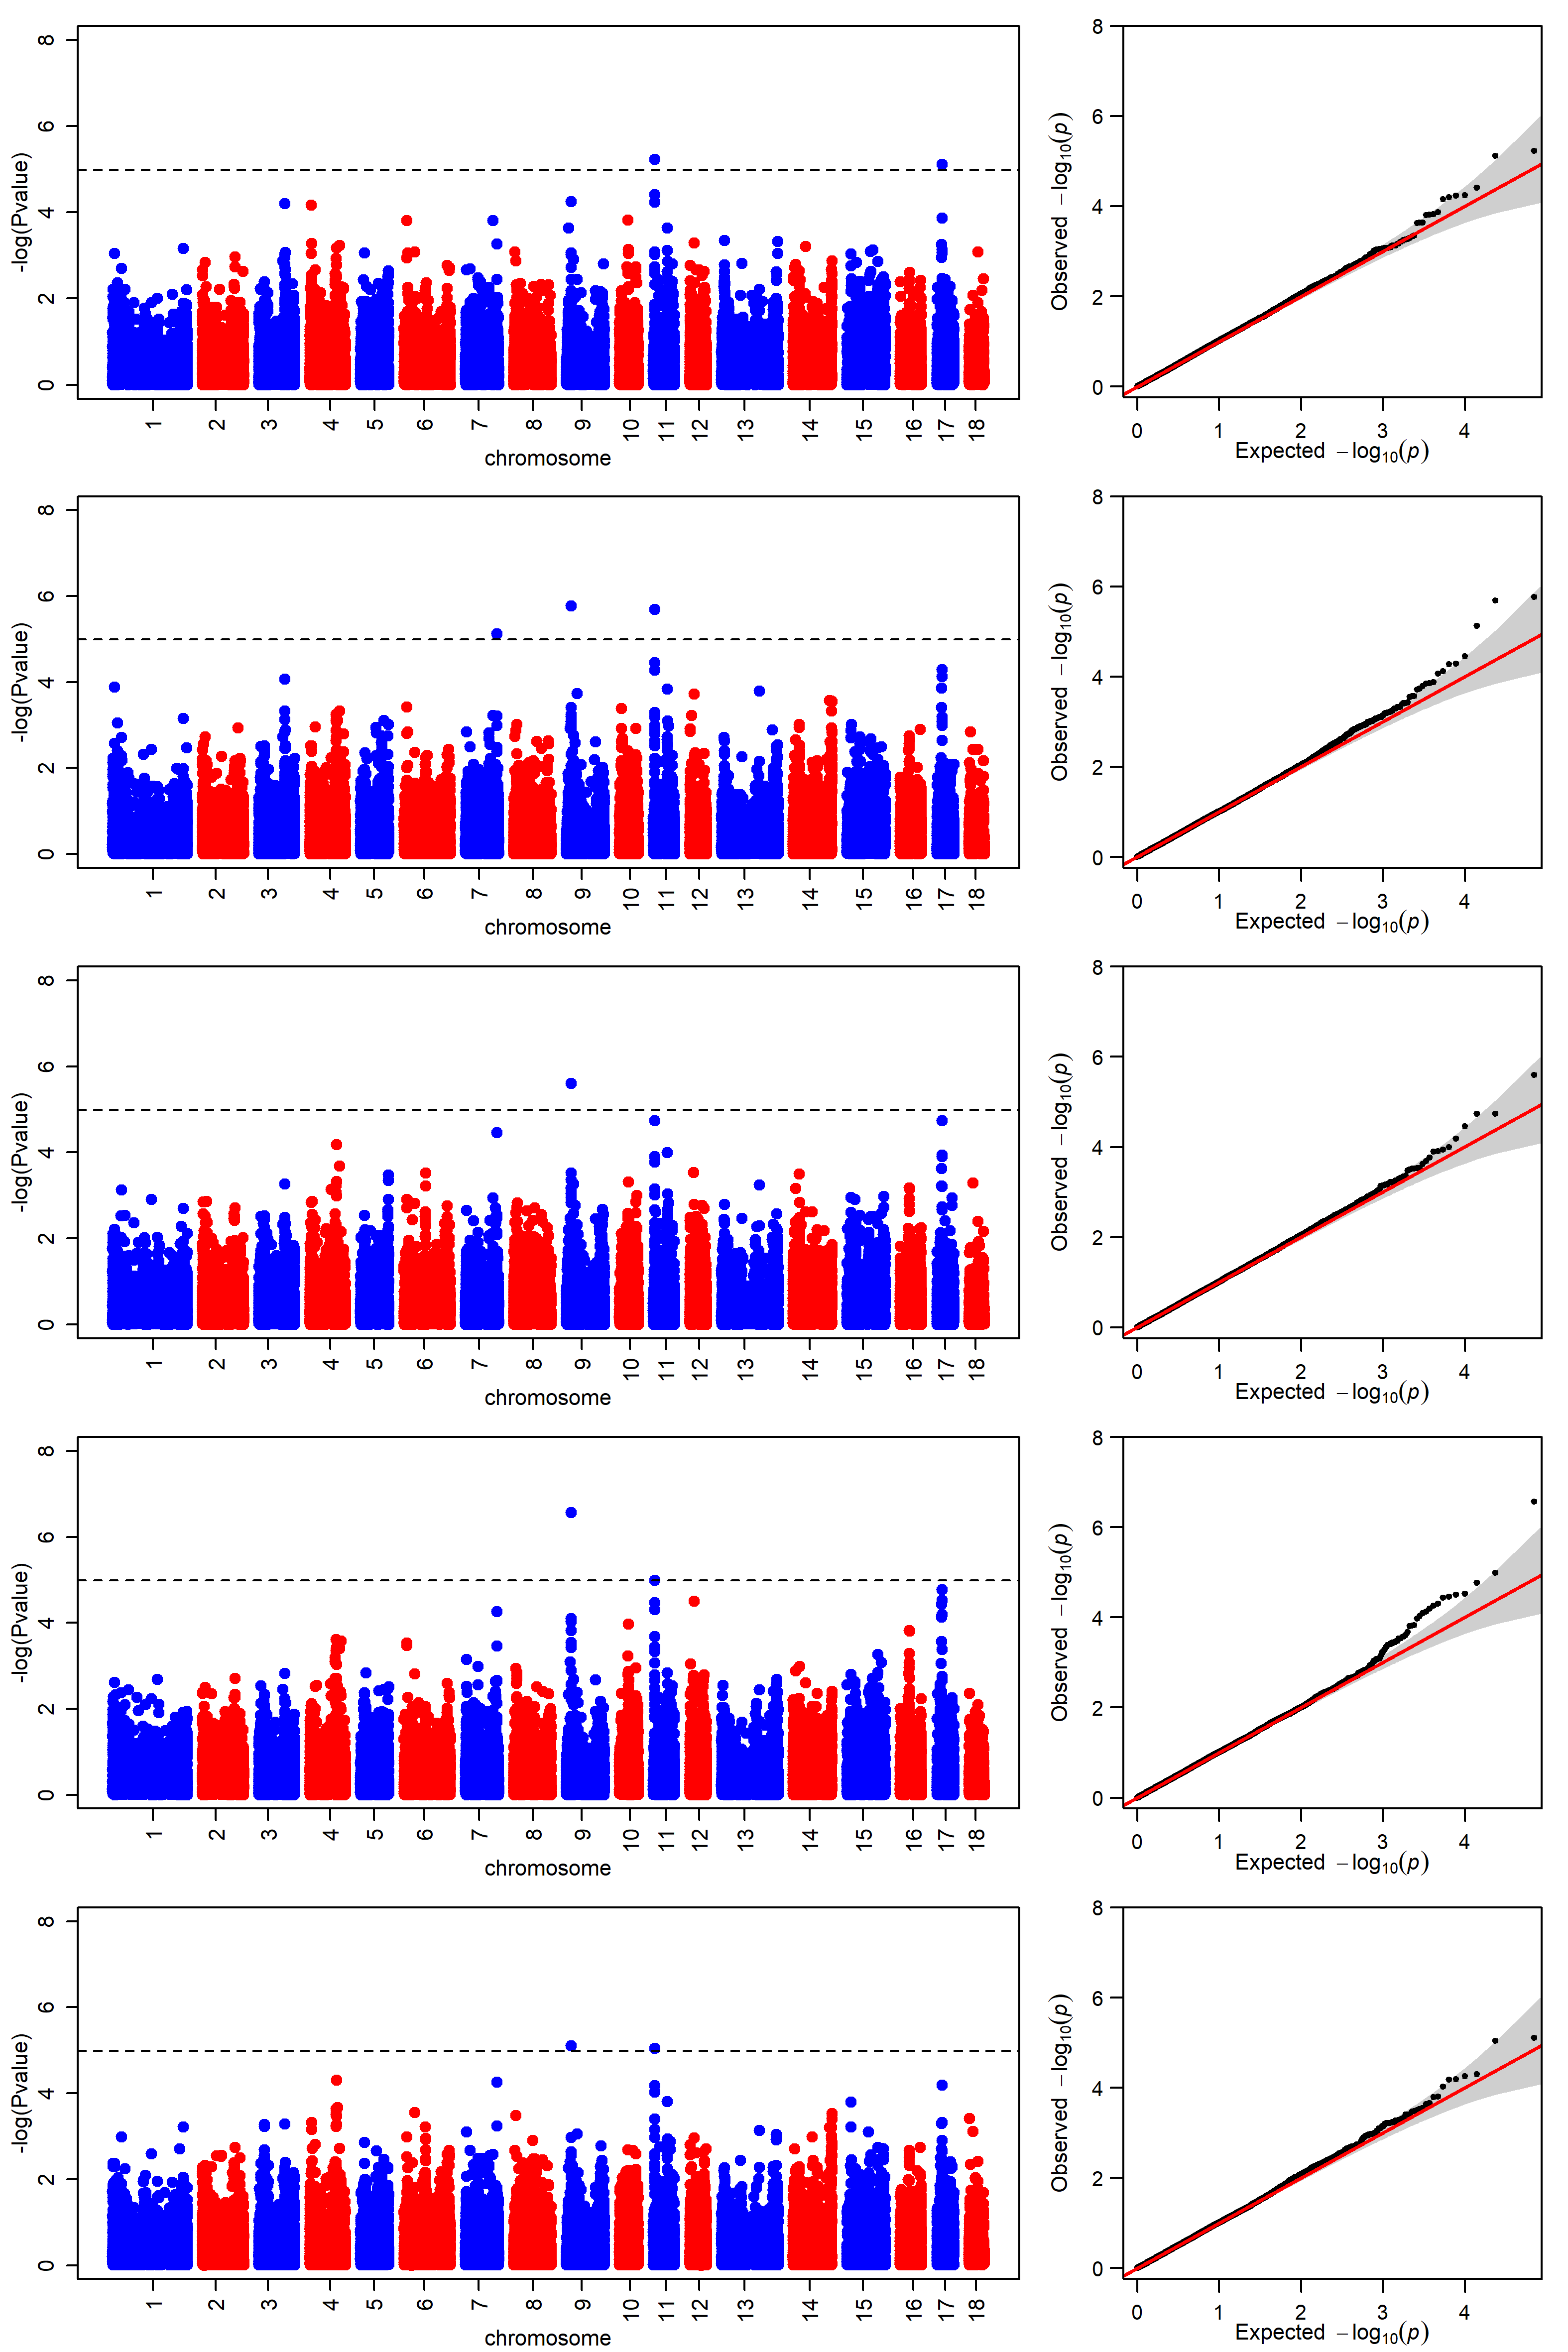


Table S1: The accession number of 69 whole genome sequence pigs from the EMBL-EBI (https://www.ebi.ac.uk/).

| **Population1** | **the accession number** |
| --- | --- |
| **AWB** | SAMEA1557396; SAMEA1557421; SAMEA2612519; SAMEA2612520; SAMEA2612521; SAMN02298082; SAMN02298083; SAMN02298084; SAMN02298085; SAMN02298086; SAMEA1557411; SAMN03031171; SAMN03031172; SAMN03031173; SAMN03031174; SAMN03031175; SAMN03031176; SAMN03031177; SAMN03031178; SAMN03031179; SAMN03031180 |
| **EWB** | SAMEA2612524; SAMEA2612525; SAMEA2612526; SAMEA2612522; SAMEA2612523; SAMEA1557403; SAMEA1557401; SAMEA2612513; SAMEA2612514; SAMEA2612515; SAMEA2612516; SAMEA2612517; SAMEA2612518; SAMEA1557424; SAMEA1557433; SAMEA1557387; SAMEA1557414 ;SAMEA1557417; SAMN02904855; SAMEA3497882; SAMEA3497883; SAMEA3497874; SAMEA3497878; SAMEA3497880; SAMEA3497881 |
| **DU** | SAMN03031126; SAMN03031127; SAMN03031128; SAMN03031129; SAMN03031130; SAMN03031131; SAMN03031132; SAMN03031133; SAMN03031134; SAMN03031135; SAMN03031136; SAMN03031137; SAMN03031138; SAMN03031139; SAMN03031140; SAMN03031141; SAMN03031142; SAMN03031143; SAMN03031144; SAMN03031145; SAMEA1557407; SAMEA1557419; SAMEA1557434 |

1 AWB is Asian wild boars, EWB is European wild boars and DU is Durocs.

Table S2: The summary of phenotypes and fixed effect in this study.

See Supplementary Table S2.xls

NOTE: phenotype = observed value – the mean of observed value

Table S3: Summary and annotation of SNPs in Asian wild boars (AWB) and European wild boars (EWB).

| **Breed** | | **AWB** | **EWB** |
| --- | --- | --- | --- |
| Sample size | | 21 | 25 |
| Average depth (X) | | 12.84 | 9.34 |
| Average genome coverage (%) | | 91.92 | 86.23 |
| Average Mapping rate (%) | | 99.71 | 99.78 |
| High-quality base (Gb) | | 674.69 | 583.99 |
| Q20 (%) | | 96.7 | 97.84 |
| Q30 (%) | | 89.84 | 91.08 |
| Number of total SNP | | 35,875,566 | 21,995,903 |
| Upstream | | 211,258 | 126,781 |
| UTR5 | | 65,049 | 38,850 |
| Exonic | Stopgain | 1,419 | 873 |
| Stoploss | 214 | 135 |
| Synonymous | 149,746 | 87,455 |
| Nonsynonymous | 97,142 | 61,553 |
| Unknown | 204 | 158 |
| Splicing | | 1,354 | 909 |
| Intronic | | 13,452,014 | 8,198,395 |
| UTR3 | | 330,903 | 200,449 |
| UTR5/UTR3 | | 1,969 | 1,185 |
| Downstream | | 227,557 | 137,666 |
| Upstream/downstream | | 5,484 | 3,191 |
| Intergenic | | 21,331,253 | 13,138,303 |

Table S4: A summary of artificial selection regions in Duroc pigs.

| **Chr.** | **Begin Pos.(Mb)** | **End Pos.(Mb)** | **P-value.1** |
| --- | --- | --- | --- |
| 1 | 6.90 | 7.35 | 0.011;0.001(AWB);0.008(EWB); |
| 1 | 15.65 | 16.20 | 0.011;-;0.007(EWB); |
| 1 | 172.05 | 173.20 | 0.001;0.010(AWB);0.012(EWB); |
| 1 | 251.45 | 251.975 | 0.018;0.006(AWB);0.017(EWB); |
| 1 | 259.55 | 260.55 | 0.001;0.003(AWB);-; |
| 2 | 86.55 | 92.75 | 0.003;0.001(AWB);-; |
| 2 | 147.875 | 148.925 | 0.001;0.007(AWB);0.016(EWB); |
| 3 | 109.90 | 110.325 | 0.020;0.010(AWB);0.005(EWB); |
| 3 | 111.60 | 112.375 | 0.009;0.006(AWB);-; |
| 4 | 99.475 | 100.525 | 0.016;-;0.018(EWB); |
| 4 | 100.60 | 101.20 | 0.017;-;0.003(EWB); |
| 4 | 126.075 | 126.975 | <0.001;-;0.005(EWB); |
| 5 | 1.425 | 2.375 | <0.001;0.002(AWB);0.015(EWB); |
| 5 | 13.175 | 13.85 | 0.007;-;0.005(EWB); |
| 5 | 103.075 | 104.60 | 0.007;0.019(AWB);0.018(EWB); |
| 6 | 43.725 | 44.575 | 0.008;0.015(AWB);-; |
| 6 | 44.575 | 45.825 | 0.011;0.015(AWB);-; |
| 6 | 102.00 | 104.275 | 0.006;0.008(AWB);0.014(EWB); |
| 6 | 104.325 | 104.80 | 0.014;0.001(AWB);0.015(EWB); |
| 7 | 13.275 | 14.20 | 0.015;0.010(AWB);0.017(EWB); |
| 7 | 14.225 | 14.90 | 0.007;0.010(AWB);-; |
| 7 | 34.95 | 35.425 | 0.015;0.003(AWB);0.009(EWB); |
| 8 | 107.275 | 108.875 | 0.009;-;0.008(EWB); |
| 8 | 108.95 | 109.85 | 0.010;0.013(AWB);-; |
| 9 | 26.825 | 27.35 | 0.001;0.015(AWB);-; |
| 9 | 34.85 | 35.30 | 0.018;<0.001(AWB);-; |
| 9 | 135.80 | 136.65 | 0.014;0.016(AWB);-; |
| 11 | 9.725 | 10.725 | 0.010;0.004(AWB);0.013(EWB); |
| 12 | 53.00 | 53.95 | 0.005;-;0.20(EWB); |
| 13 | 55.850 | 57.40 | 0.009;-;0.001(EWB); |
| 13 | 58.475 | 59.75 | 0.004;-;0.002(EWB); |
| 13 | 155.30 | 155.725 | 0.020;0.015(AWB);-; |
| 13 | 191.25 | 191.675 | 0.014;0.004(AWB);-; |
| 13 | 203.10 | 203.525 | 0.015;0.013(AWB);-; |
| 14 | 114.625 | 118.325 | <0.001;0.004(AWB);0.007(EWB); |
| 15 | 0 | 0.40 | 0.003;0.011(AWB);0.014(EWB); |
| 15 | 58.675 | 59.325 | 0.010;0.010(AWB);-; |
| 16 | 44.475 | 45.075 | 0.011;0.017(AWB);-; |

1This column presents the genome-wide P-values of sweep statistics that are listed in this order: CLR, FST(AWB), FST(EWB).

Table S5: Comparison of SNPs in whole genome and in selection regions based on the whole genome sequencing data of Duroc pigs.

| **Category** | | **Whole genome** | **Artificial selection region** |
| --- | --- | --- | --- |
| Upstream | | 92,785  (0.6258%) | 1,190  (0.4787%) |
| UTR5 | | 28,436  (0.1918%) | 523  (0.2104%) |
| Exonic | Stopgain | 545  (0.0037%) | 10  (0.0041%) |
| Stoploss | 117  (0.0008%) | 3  （0.0012%） |
| Synonymous | 66,285  (0.4470%) | 1228  (0.4974%) |
| Nonsynonymous | 44,660  (0.3012%) | 683  (0.2767%) |
| Unknown | 152  (0.0010%) | 0 |
| Splicing | | 614  (0.0041%) | 13  (0.0052%) |
| Intronic | | 5,496,375  (37.069%) | 97,287  (39.136%) |
| UTR3 | | 133,194  (0.8983%) | 2,500  (1.0057%) |
| UTR5/UTR3 | | 702  (0.0047%) | 43  (0.0173%) |
| Downstream | | 98,207  (0.6623%) | 1,281  (0.5153%) |
| Upstream/downstream | | 2,328  (0.0157%) | 53  (0.0213%) |
| Intergenic | | 8,863,149  (59.775%) | 143,978  (57.918%) |
| Number of total SNP | | 14,827,549  (100%) | 246,868  (100%) |

Table S6: A summary of GWAS for intramuscular fat (IMF) and feed conversion ratio (FCR) traits variation in Duroc pigs.

| **Chr.** | **Pos.(bp)** | **-log(P-value)** | **Nearby Sweep Region** | **Nearby Genes/QTLs** |
| --- | --- | --- | --- | --- |
| **1** | 8430665;  8575536;  8575556;  8845023; | 5.46 (IMF) | 7125000-7150000,0.01(CLR);  8200000-8225000,0.017(FST,AWB)  8150000-8975000, 0.006(FST,EWB); | *IGF2R*; *TMEM181*;  *SOD2*;  *TAGAP*;  Drip loss QTL; Stearic acid content QTL; |
| 9 | 17505393 | 5.56 (FCR) | 17200000-17225000,0.017(FST,AWB)  17725000-17750000,0.01(FST,EWB) | *PCF11*; *ANKRD42*; *CCDC90B*; *DLG2*; Time spent feeding QTL*;* |
| 11 | 5620047 | 5.16 (FCR) | 4800000-4825000,0.033(CLR)  5825000-5850000,0.006(FST,AWB)  4900000-4925000,0.005(FST,EWB) | *FLT3*; *PAN3*; *FLT1* |
| 17 | 18651444 | 5.16 (FCR) | 18375000-18400000,0.048(CLR)  16775000-16800000,0.014(FST,AWB)  17050000-17075000,0.001(FST,EWB) | *LAMP5*; *PAK5* |

Table S7: The genotype-class frequencies and phenotypic means for 7 particular SNPs.

| **IMF** |  |  |  | **FCR** |  |  |  |
| --- | --- | --- | --- | --- | --- | --- | --- |
| rs340788032 | CC | AC | AA | rs330638537 | GG | GC | CC |
| Freq. | 0.45 | 0.29 | 0.26 | Freq. | 0.45 | 0.25 | 0.30 |
| M_phe | 1.83 | 2.07 | 2.25 | M_phe | 2.19 | 2.05 | 2.04 |
| rs707781124 | CC | TC | TT | rs329888489 | TT | TC | CC |
| Freq. | 0.41 | 0.33 | 0.26 | Freq. | 0.04 | 0.07 | 0.89 |
| M_phe | 1.86 | 1.95 | 2.31 | M_phe | 2.40 | 2.24 | 2.09 |
| rs711970670 | GG | AG | AA | rs320554563 | GG | AG | AA |
| Freq. | 0.41 | 0.33 | 0.26 | Freq. | 0.49 | 0.39 | 0.12 |
| M_phe | 1.87 | 1.94 | 2.33 | M_phe | 2.18 | 2.07 | 1.99 |
| rs320531432 | CC | TC | TT |  |  |  |  |
| Freq. | 0.47 | 0.28 | 0.25 |  |  |  |  |
| M_phe | 1.85 | 2.07 | 2.25 |  |  |  |  |

IMF: intramuscular fat, FCR: feed conversion ratio.

Table S8: The genes overlap with the 7.00-10.00Mb selection regions on SSC1 in Duroc pigs.

| **Chr.** | **Pos. (Mb)1** | **P-value. (method)2** | **Gene** | **Gene function** |
| --- | --- | --- | --- | --- |
| 1 | 6891751..7050374;-1 | 0.01;0.002(AWB);0.008(EWB); | *MAP3K4* | sex determination |
| 1 | 7108101..7207402;-1 | 0.01;0.002(AWB);0.008(EWB); | *SLC22A3* | - |
| 1 | 7339285..7365520;-1 | 0.01;0.002(AWB);0.008(EWB); | *SLC22A1* | - |
| 1 | 7368103..7472548;-1 | 0.01; 0.04(AWB);0.05(EWB) | *IGF2R* | growth and development |
| 1 | 7527861..7528838;-1 | 0.028; 0.04(AWB); | *MAS1* | - |
| 1 | 7560416..7578687;-1 | 0.028; 0.04(AWB); | *PNLDC1* | - |
| 1 | 7579238..7590015;-1 | 0.028; 0.04(AWB); | *MRPL18* | - |
| 1 | 7597333..7612910;-1 | 0.028; 0.04(AWB); | *ACAT2* | - |
| 1 | 7622547..7651613;-1 | 0.028; 0.04(AWB); | *WTAP* | - |
| 1 | 8007994..8085558;-1 | 0.046; 0.04(AWB);0.008(EWB) | *FNDC1* | muscle and bone development |
| 1 | 8453508..8536381;-1 | 0.046; 0.026(AWB);0.017(EWB) | *SYTL3* | - |
| 1 | 8566751..8635729;-1 | 0.046;0.026(AWB);0.017(EWB) | *TMEM181* | - |
| 1 | 8655450..8823128;-1 | 0.046;0.026(AWB);0.017(EWB) | *TULP4* | - |
| 1 | 8928300..8934989;-1 | -;0.034(AWB); 0.01(EWB) | *GTF2H5* | - |
| 1 | 9014209..9109066;-1 | -;0.034(AWB); 0.01(EWB) | *SYNJ2* | - |
| 1 | 9130336..9238992;-1 | -;0.034(AWB); 0.01(EWB) | *SNX9* | - |
| 1 | 9350255..9619672;-1 | -;0.034(AWB); 0.01(EWB) | *ZDHHC14* | - |
| 1 | 9791634..10227947;-1 | -;<0.023(EWB) 0.023(EWB) | *ARID1B* | growth |
| 1 | 7061969..7109531;+1 | 0.01;0.002(AWB);0.008(EWB); | *PLG* | - |
| 1 | 7230644..7230770;+1 | 0.01;0.002(AWB);0.008(EWB); | *RF00425* | - |
| 1 | 7289170..7323644;+1 | 0.01;0.002(AWB);0.008(EWB); | *SLC22A2* | - |
| 1 | 7590140..7601795;+1 | 0.028; 0.04(AWB); | *TCP1* | - |
| 1 | 7593176..7593315;+1 | 0.028; 0.04(AWB); | *RF00429* | - |
| 1 | 7599025..7599157;+1 | 0.028; 0.04(AWB); | *RF00401* | - |
| 1 | 7679352..7691724;+1 | 0.028; 0.04(AWB);0.008(EWB) | *SOD2* | fertility |
| 1 | 8208084..8218717;+1 | 0.046;0.017(AWB);0.008(EWB) | *TAGAP* | - |
| 1 | 8243300..8265639;+1 | 0.046;0.017(AWB);0.005(EWB) | *RSPH3* | - |
| 1 | 8403355..8452747;+1 | 0.046;0.025(AWB);0.005(EWB) | *EZR* | - |
| 1 | 8765339..8767283;+1 | 0.046;0.025(AWB);0.005(EWB) | *NDUFA3* | - |
| 1 | 8555745..8567087;+1 | 0.046;0.025(AWB);0.017(EWB) | *DYNLT1* | fertility |
| 1 | 8935073..9001474;+1 | -;0.034(AWB); 0.01(EWB) | *SERAC1* | - |
| 1 | 9667885..9719230;+1 | -; 0.23(EWB) | *TMEM242* | - |

1 ‘-1’ represents minus-strand, ‘+1’ represents positive-strand.

2 This column presents the genome-wide P-values of sweep statistics.

Table S9: A partial list of enrichment analysis terms based on the candidate artificial selection regions in Duroc pigs.

| Category | Term | Count | P_value |
| --- | --- | --- | --- |
| GOTERM_BP_DIRECT | GO:0042267~natural killer cell mediated cytotoxicity | 6 | <0.001 |
| GOTERM_BP_DIRECT | GO:0019882~antigen processing and presentation | 6 | 0.002 |
| GOTERM_BP_DIRECT | GO:0043651~linoleic acid metabolic process | 6 | 0.030 |
| GOTERM_BP_DIRECT | GO:0019372~lipoxygenase pathway | 3 | 0.018 |
| GOTERM_BP_DIRECT | GO:0006855~drug transmembrane transport | 3 | 0.037 |
| GOTERM_CC_DIRECT | GO:0072557~IPAF inflammasome complex | 4 | <0.001 |
| GOTERM_CC_DIRECT | GO:0097169~AIM2 inflammasome complex | 4 | <0.001 |
| GOTERM_MF_DIRECT | GO:0046703~natural killer cell lectin-like receptor bindin | 6 | <0.001 |
| GOTERM_MF_DIRECT | GO:0015101~organic cation transmembrane transporter activity | 4 | 0.005 |
| GOTERM_MF_DIRECT | GO:0005329~dopamine transmembrane transporter activity | 3 | 0.001 |
| KEGG_PATHWAY | hsa00790:Folate biosynthesis | 4 | 0.019 |
| KEGG_PATHWAY | hsa04650:Natural killer cell mediated cytotoxicity | 6 | 0.003 |

References

Bogani, D., P. Siggers, R. Brixey, N. Warr, S. Beddow *et al.*, 2009 Loss of Mitogen-Activated Protein Kinase Kinase Kinase 4 (MAP3K4) Reveals a Requirement for MAPK Signalling in Mouse Sex Determination. Plos Biology **7**.

Indu, S., S. C. Sekhar, J. Sengottaiyan, A. Kumar, S. M. Pillai *et al.*, 2015 Aberrant Expression of Dynein light chain 1 (DYNLT1) is Associated with Human Male Factor Infertility. Molecular & Cellular Proteomics **14:** 3185-3195.

Kano, Y., M. Konno, K. Ohta, N. Haraguchi, S. Nishikawa *et al.*, 2013 Jumonji/Arid1b (Jarid1b) protein modulates human esophageal cancer cell growth. Molecular & Clinical Oncology **1:** 753-757.

Kwiatkowska, J., B. Wąsowska and P. Gilun, 2017 Expression of hypoxia inducible factor 1α and antioxidant enzymes: Superoxide dismutases-1 and -2 in ischemic porcine endometrium. Reproductive Biology.

Tanaka, K., E. Matsumoto, Y. Higashimaki, T. Katagiri, T. Sugimoto *et al.*, 2012 Role of Osteoglycin in the Linkage between Muscle and Bone. Journal of Biological Chemistry **287:** 11616-11628.

Wang, K., P. X. Wu, Q. Yang, D. J. Chen, J. Zhou *et al.*, 2018 Detection of Selection Signatures in Chinese Landrace and Yorkshire Pigs Based on Genotyping-by-Sequencing Data. Frontiers in Genetics **9**.
